# Supplementary material
Source: Springer Nature journal article supplement (https://www.springermedizin.de/resource/supplementary/13054_2013_2563_MOESM1_ESM.pdf/9714244)
Supplement: MOESM1 [file 9714244]

Table. S1 The names of all ethical bodies involved in the six enrolled trials

| First author             | Year | Names of ethical bodies    |                                                                                           |
|--------------------------|------|----------------------------|-------------------------------------------------------------------------------------------|
| Derdak <sup>[18]</sup>   | 2002 | Ethical committee board of | Participating institutions as follow:                                                     |
|                          |      |                            | Wilford Hall Medical Center/Brooke Army Medical Center                                    |
|                          |      |                            | Mt. Sinai Hospital/Wellesley Hospital, University of Toronto                              |
|                          |      |                            | Barnes Jewish Hospital                                                                    |
|                          |      |                            | University Health Network, University of Toronto                                          |
|                          |      |                            | University of Virginia Medical Center                                                     |
|                          |      |                            | Maine Medical Center                                                                      |
|                          |      |                            | Loma Linda University Medical Center                                                      |
|                          |      |                            | Sunnybrook and Women's College Health Sciences Center, University of Toronto              |
|                          |      |                            | Allegheny General Hospital                                                                |
| Bollen <sup>[19]</sup>   | 2005 | Ethical committee board of | Bronson Methodist Hospital                                                                |
|                          |      |                            | Participating institutions as follow:                                                     |
|                          |      |                            | St Thomas Hospital, London                                                                |
|                          |      |                            | University Hospital of Wales, Cardiff                                                     |
|                          |      |                            | Hopital Cochin, Paris                                                                     |
|                          |      |                            | University Hospital Mainz, Germany                                                        |
| Demory <sup>[20]</sup>   | 2007 | Ethical committee board of | University Medical Centre Utrecht, The Netherlands                                        |
|                          |      |                            | Participating institution as follow:                                                      |
| Ferguson <sup>[21]</sup> | 2013 | Ethical committee board of | Comité Consultatif de Protection des Personnes dans la Recherche Biomédicale de Marseille |
|                          |      |                            | Participating institutions as follow:                                                     |
|                          |      |                            | Toronto General Hospital                                                                  |
|                          |      |                            | Toronto Western Hospital                                                                  |
|                          |      |                            | Mount Sinai Hospital                                                                      |
|                          |      |                            | St. Michael's Hospital                                                                    |
|                          |      |                            | Sunnybrook Health Science Centre                                                          |
|                          |      |                            | St. Joseph's Hospital                                                                     |

|                       |      |                                  |                                                             |
|-----------------------|------|----------------------------------|-------------------------------------------------------------|
|                       |      |                                  | Hamilton Health Sciences                                    |
|                       |      |                                  | St. Joseph's Healthcare                                     |
|                       |      |                                  | University of Western Ontario                               |
|                       |      |                                  | Royal Victoria Hospital                                     |
|                       |      |                                  | Ottawa Hospital General Campus                              |
|                       |      |                                  | Ottawa Hospital Civic Campus                                |
|                       |      |                                  | Hôpital Maisonneuve - Rosemont                              |
|                       |      |                                  | Centre Hospitalier del' Universite de Montreal<br>Saint Luc |
|                       |      |                                  | Hôpital du Sacré - Coeur de Montreal                        |
|                       |      |                                  | Centre Hospitalier de l' Universite de Sherbrooke           |
|                       |      |                                  | Hôpital L' Enfant Jesus                                     |
|                       |      |                                  | Centre de Santé et de Services Sociaux de St.<br>Jérôme     |
|                       |      |                                  | Queen Elizabeth II Health Sciences Centre                   |
|                       |      |                                  | Vancouver Island Health Authority                           |
|                       |      |                                  | Vancouver General Hospital                                  |
|                       |      |                                  | St. Paul's Hospital                                         |
|                       |      |                                  | Royal Columbian Hospital                                    |
|                       |      |                                  | Surrey Memorial Hospital                                    |
|                       |      |                                  | University of Alberta                                       |
|                       |      |                                  | Health Sciences Centre                                      |
|                       |      |                                  | Scott & White Memorial Hospital                             |
|                       |      |                                  | University of Texas Health Science Centre                   |
|                       |      |                                  | Parkland Memorial Hospital                                  |
|                       |      |                                  | John Peter Smith Hospital                                   |
|                       |      |                                  | Orlando Regional Medical Centre                             |
|                       |      |                                  | University of Michigan Ann Arbor                            |
|                       |      |                                  | Denver Health Medical Centre                                |
|                       |      |                                  | Brody School of Medicine at East Carolina<br>University     |
|                       |      |                                  | King Saud Bin Abdulaziz University for Health<br>Science    |
|                       |      |                                  | Riyadh Armed Forces Hospital                                |
|                       |      |                                  | Pontifica Universidad Catolica de Chile                     |
|                       |      |                                  | Deenanath Mangeshkar Hospital & Research<br>Centre          |
| Young <sup>[22]</sup> | 2013 | Ethical<br>committee<br>board of | Participating institutions as follow:                       |
|                       |      |                                  | John Radcliffe Hospital, Oxford                             |
|                       |      |                                  | Derriford Hospital, Plymouth                                |
|                       |      |                                  | Aberdeen Royal Infirmary, Aberdeen                          |

|                      |      |                                  |                                                                 |
|----------------------|------|----------------------------------|-----------------------------------------------------------------|
|                      |      |                                  | Medway Hospital, Gillingham                                     |
|                      |      |                                  | Queen Elizabeth Hospital, Birmingham                            |
|                      |      |                                  | Royal Sussex County Hospital, Brighton                          |
|                      |      |                                  | University College Hospital, London                             |
|                      |      |                                  | University Hospital of Wales, Cardiff                           |
|                      |      |                                  | Royal United Hospital, Bath                                     |
|                      |      |                                  | Manchester Royal Infirmary, Manchester                          |
|                      |      |                                  | Ysbyty Maelor Hospital, Wrexham                                 |
|                      |      |                                  | Queen Elizabeth Hospital, Gateshead                             |
|                      |      |                                  | Stirling Royal Infirmary, Stirling                              |
|                      |      |                                  | Royal Cornwall Hospital, Truro                                  |
|                      |      |                                  | Wythenshawe Hospital, Manchester                                |
|                      |      |                                  | University Hospital of North Staffordshire ,<br>Stoke- on-Trent |
|                      |      |                                  | Ipswich Hospital, Ipswich                                       |
|                      |      |                                  | Manchester Royal Infirmary (Cardiac),<br>Manchester             |
|                      |      |                                  | James Paget Hospital, Great Yarmouth                            |
|                      |      |                                  | Queen Alexandra Hospital, Portsmouth                            |
|                      |      |                                  | Queen Margaret Hospital, Dunfermline                            |
|                      |      |                                  | Royal Blackburn Hospital, Blackburn                             |
|                      |      |                                  | Leeds General Infirmary, Leeds                                  |
|                      |      |                                  | Southampton General Hospital, Southampton                       |
|                      |      |                                  | St James University Hospital, Leeds                             |
|                      |      |                                  | York Hospital, York                                             |
|                      |      |                                  | Victoria Hospital, Blackpool                                    |
|                      |      |                                  | Southend Hospital, Westcliff- on- Sea                           |
|                      |      |                                  | Royal Victoria Infirmary, Newcastle                             |
| Shah <sup>[30]</sup> | 2004 | Ethical<br>committee<br>board of | Participating institution as follow                             |
|                      |      |                                  | University Hospital of Wales, Cardiff, United<br>Kingdom        |
